# Supplementary material
Source: PubMed Central journal article supplement (PMC3601374)
Supplement: NIHMS450927-supplement-SM-1.pdf [file NIHMS450927-supplement-SM-1.pdf]

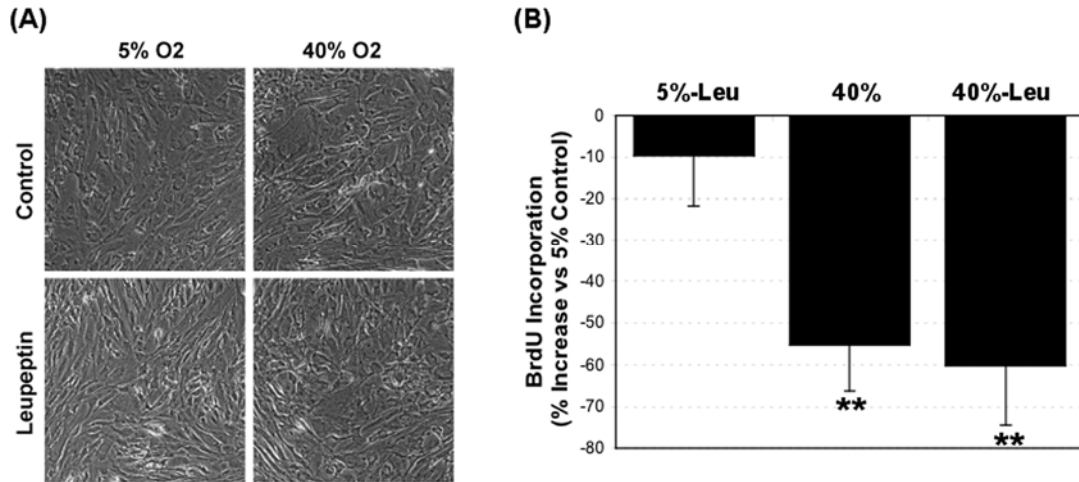

**Supplementary Figure S1.** (A) Bright field images of porcine TM cells monolayers following the stress period. Tripan blue staining showed more than 98% of viable cells in all the conditions. (B) Proliferation rate of porcine TM cells quantified by BrdU incorporation during 24 hours following chronic oxidative stress. Graphs represent the percentage of increase compared to 5% O<sub>2</sub> conditions. Data are means  $\pm$  SD, n=3, \* p=0.0009.
