# Supplementary material
Source: PubMed Central journal article supplement (PMC3601374)
Supplement: NIHMS450927-supplement-SM-2.pdf [file NIHMS450927-supplement-SM-2.pdf]

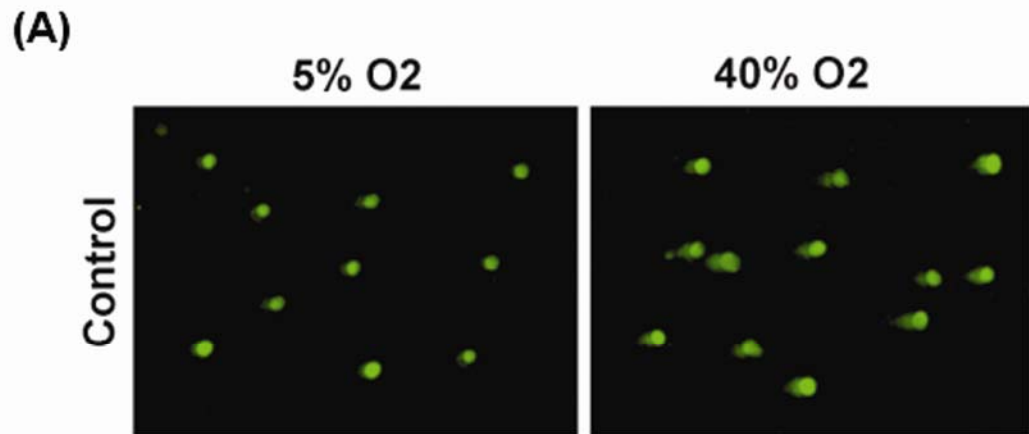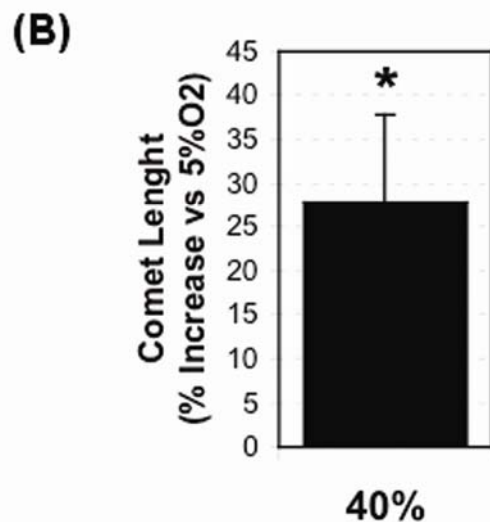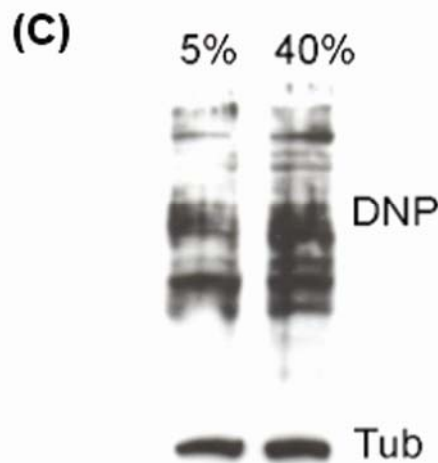

**Supplementary Figure S2.** (A) Visualization of DNA damage in porcine TM cells grown under hyperoxic conditions by single cell gel electrophoresis assay. Following stress period, cells were suspended in agarose and subjected to lysis/ alkaline electrophoresis (30 Volts, 300 mA, 30 min). DNA damage (single/double stranded DNA breaks as well as alkali labile DNA adducts) was visualized using SYBR Green. Pictures are representative of three different experiments. (B) Quantification of the comet length using the comet scoring software Comet Score<sup>TM</sup>. The experiment was performed in triplicate using three different cell lines. The length of fifty comets from each group was measured and averaged. Graph represents the percentage of increase in comet length in cells grown at 40% O<sub>2</sub> compared to 5% O<sub>2</sub>. Data are means  $\pm$  SD, n=3, \* p=0.04. (C) Immunodetection of protein carbonyl groups. Total cell lysate proteins (20  $\mu$ g) were derivatized, separated by SDS-PAGE and immunoblotted with an antibody anti-DNP. Tubulin protein levels were used as loading control. Blot is representative of three independent experiments.
